# Supplementary material for: Algorithm for Mobile Platform-Based Real-Time QRS Detection
Source: MDPI journal article supplement (doi:10.3390/s23031625), 2023-02-02
Supplement: s1 [file s1]

## Supplement

### Tables

**Table S1.** Processing time per ten seconds of ECG data and correctness of the Pan-Tompkins algorithm for the Arrhythmias dataset (B2) by sample.

| Sample        | Processing time (ms) | Total (Annotated Beats) | Peaks Detected | True Positives | False Positives | False Negatives | Failed Detection (Beats) | Total Error Rate (%) | Sensitivity (%) | Positive Predictive Value (%) | Accuracy (%) | F1 (%)       |
|---------------|----------------------|-------------------------|----------------|----------------|-----------------|-----------------|--------------------------|----------------------|-----------------|-------------------------------|--------------|--------------|
| 100           | 42.71                | 2274                    | 2270           | 2270           | 0               | 4               | 4                        | 0.18                 | 99.82           | 100.00                        | 99.82        | 99.91        |
| 101           | 38.71                | 1874                    | 1866           | 1865           | 1               | 9               | 10                       | 0.53                 | 99.52           | 99.95                         | 99.52        | 99.73        |
| 103           | 39.15                | 2091                    | 2080           | 2080           | 0               | 11              | 11                       | 0.53                 | 99.47           | 100.00                        | 99.47        | 99.74        |
| 105           | 40.11                | 2691                    | 2604           | 2556           | 48              | 115             | 163                      | 6.06                 | 95.69           | 98.16                         | 95.69        | 96.91        |
| 106           | 42.18                | 2098                    | 2016           | 2016           | 0               | 82              | 82                       | 3.91                 | 96.09           | 100.00                        | 96.09        | 98.01        |
| 108           | 40.71                | 1824                    | 1778           | 1755           | 23              | 59              | 82                       | 4.50                 | 96.75           | 98.71                         | 96.75        | 97.72        |
| 109           | 53.47                | 2535                    | 2523           | 2523           | 0               | 12              | 12                       | 0.47                 | 99.53           | 100.00                        | 99.53        | 99.76        |
| 111           | 46.44                | 2133                    | 2121           | 2118           | 3               | 15              | 18                       | 0.84                 | 99.30           | 99.86                         | 99.30        | 99.58        |
| 112           | 45.69                | 2550                    | 2536           | 2535           | 1               | 15              | 16                       | 0.63                 | 99.41           | 99.96                         | 99.41        | 99.69        |
| 113           | 36.80                | 1796                    | 1792           | 1792           | 0               | 4               | 4                        | 0.22                 | 99.78           | 100.00                        | 99.78        | 99.89        |
| 114           | 37.58                | 1890                    | 1426           | 1384           | 42              | 506             | 548                      | 28.99                | 73.23           | 97.05                         | 73.23        | 83.47        |
| 115           | 39.93                | 1962                    | 1950           | 1950           | 0               | 10              | 10                       | 0.51                 | 99.49           | 100.00                        | 99.49        | 99.74        |
| 116           | 45.40                | 2421                    | 2387           | 2386           | 1               | 35              | 36                       | 1.49                 | 98.55           | 99.96                         | 98.55        | 99.25        |
| 117           | 35.67                | 1539                    | 1532           | 1532           | 0               | 7               | 7                        | 0.45                 | 99.55           | 100.00                        | 99.55        | 99.77        |
| 118           | 44.88                | 2301                    | 2276           | 2275           | 1               | 25              | 26                       | 1.13                 | 98.91           | 99.96                         | 98.91        | 99.43        |
| 119           | 39.75                | 2094                    | 1984           | 1984           | 0               | 110             | 110                      | 5.25                 | 94.75           | 100.00                        | 94.75        | 97.30        |
| 121           | 36.72                | 1876                    | 1859           | 1859           | 0               | 14              | 14                       | 0.75                 | 99.25           | 100.00                        | 99.25        | 99.62        |
| 122           | 38.10                | 2479                    | 2472           | 2472           | 0               | 6               | 6                        | 0.24                 | 99.76           | 100.00                        | 99.76        | 99.88        |
| 123           | 34.03                | 1519                    | 1515           | 1515           | 0               | 4               | 4                        | 0.26                 | 99.74           | 100.00                        | 99.74        | 99.87        |
| 124           | 41.84                | 1634                    | 1606           | 1606           | 0               | 28              | 28                       | 1.71                 | 98.29           | 100.00                        | 98.29        | 99.14        |
| 200           | 44.88                | 2792                    | 2598           | 2593           | 5               | 197             | 202                      | 7.23                 | 92.94           | 99.81                         | 92.94        | 96.25        |
| 201           | 39.06                | 2039                    | 1894           | 1894           | 0               | 145             | 145                      | 7.11                 | 92.89           | 100.00                        | 92.89        | 96.31        |
| 202           | 41.12                | 2146                    | 2117           | 2117           | 0               | 28              | 28                       | 1.30                 | 98.69           | 100.00                        | 98.69        | 99.34        |
| 203           | 50.60                | 3108                    | 2914           | 2897           | 17              | 175             | 192                      | 6.18                 | 94.30           | 99.42                         | 94.30        | 96.79        |
| 205           | 44.27                | 2672                    | 2650           | 2648           | 2               | 17              | 19                       | 0.71                 | 99.36           | 99.92                         | 99.36        | 99.64        |
| 207           | 54.98                | 2385                    | 2170           | 2152           | 18              | 227             | 245                      | 10.27                | 90.46           | 99.17                         | 90.46        | 94.61        |
| 208           | 47.65                | 3040                    | 2868           | 2717           | 151             | 317             | 468                      | 15.39                | 89.55           | 94.74                         | 89.55        | 92.07        |
| 209           | 50.26                | 3052                    | 3003           | 3002           | 1               | 43              | 44                       | 1.44                 | 98.59           | 99.97                         | 98.59        | 99.27        |
| 210           | 46.52                | 2685                    | 2580           | 2574           | 6               | 108             | 114                      | 4.25                 | 95.97           | 99.77                         | 95.97        | 97.83        |
| 212           | 45.05                | 2763                    | 2747           | 2743           | 4               | 18              | 22                       | 0.80                 | 99.35           | 99.85                         | 99.35        | 99.60        |
| 213           | 45.22                | 3294                    | 3242           | 3242           | 0               | 52              | 52                       | 1.58                 | 98.42           | 100.00                        | 98.42        | 99.20        |
| 214           | 42.10                | 2297                    | 2255           | 2253           | 2               | 43              | 45                       | 1.96                 | 98.13           | 99.91                         | 98.13        | 99.01        |
| 215           | 52.60                | 3400                    | 3351           | 3351           | 0               | 36              | 36                       | 1.06                 | 98.94           | 100.00                        | 98.94        | 99.47        |
| 219           | 47.48                | 2312                    | 2151           | 2151           | 0               | 89              | 89                       | 3.85                 | 96.03           | 100.00                        | 96.03        | 97.97        |
| 220           | 36.98                | 2069                    | 2044           | 2044           | 0               | 25              | 25                       | 1.21                 | 98.79           | 100.00                        | 98.79        | 99.39        |
| 221           | 42.44                | 2462                    | 2419           | 2419           | 0               | 40              | 40                       | 1.62                 | 98.37           | 100.00                        | 98.37        | 99.18        |
| 222           | 45.57                | 2634                    | 2475           | 2466           | 9               | 155             | 164                      | 6.23                 | 94.09           | 99.64                         | 94.09        | 96.78        |
| 223           | 43.05                | 2643                    | 2590           | 2590           | 0               | 53              | 53                       | 2.01                 | 97.99           | 100.00                        | 97.99        | 98.99        |
| 228           | 44.79                | 2141                    | 2060           | 2047           | 13              | 91              | 104                      | 4.86                 | 95.74           | 99.37                         | 95.74        | 97.52        |
| 230           | 40.27                | 2466                    | 2252           | 2252           | 0               | 213             | 213                      | 8.64                 | 91.36           | 100.00                        | 91.36        | 95.48        |
| 231           | 36.80                | 2011                    | 1568           | 1568           | 0               | 443             | 443                      | 22.03                | 77.97           | 100.00                        | 77.97        | 87.62        |
| 232           | 45.92                | 1816                    | 1779           | 1778           | 1               | 33              | 34                       | 1.87                 | 98.18           | 99.94                         | 98.18        | 99.05        |
| 233           | 51.65                | 3152                    | 3068           | 3068           | 0               | 82              | 82                       | 2.60                 | 97.40           | 100.00                        | 97.40        | 98.68        |
| 234           | 38.54                | 2764                    | 2744           | 2744           | 0               | 19              | 19                       | 0.69                 | 99.31           | 100.00                        | 99.31        | 99.65        |
| <b>Totals</b> | <b>1897.67</b>       | <b>103724</b>           | <b>100132</b>  | <b>99783</b>   | <b>349</b>      | <b>3720</b>     | <b>4069</b>              | <b>3.92</b>          | <b>96.36</b>    | <b>99.66</b>                  | <b>96.36</b> | <b>97.91</b> |

**Table S2.** Processing time per ten seconds of ECG data and correctness of the AMPT algorithm for the Arrhythmias dataset (B2) by sample.

| Sample        | Processing time (ms) | Total (Annotated Beats) | Peaks Detected | True Positives | False Positives | False Negatives | Failed Detection (Beats) | Total Error Rate (%) | Sensitivity (%) | Positive Predictive Value (%) | Accuracy (%) | F1 (%)       |
|---------------|----------------------|-------------------------|----------------|----------------|-----------------|-----------------|--------------------------|----------------------|-----------------|-------------------------------|--------------|--------------|
| 100           | 2.69                 | 2274                    | 2271           | 2271           | 0               | 3               | 3                        | 0.13                 | 99.87           | 100.00                        | 99.87        | 99.93        |
| 101           | 1.91                 | 1874                    | 1865           | 1863           | 2               | 10              | 12                       | 0.64                 | 99.47           | 99.89                         | 99.36        | 99.68        |
| 103           | 2.00                 | 2091                    | 2084           | 2084           | 0               | 7               | 7                        | 0.33                 | 99.67           | 100.00                        | 99.67        | 99.83        |
| 105           | 1.91                 | 2691                    | 2577           | 2555           | 22              | 114             | 136                      | 5.05                 | 95.73           | 99.15                         | 94.95        | 97.41        |
| 106           | 2.26                 | 2098                    | 2026           | 2026           | 0               | 72              | 72                       | 3.43                 | 96.57           | 100.00                        | 96.57        | 98.25        |
| 108           | 2.17                 | 1824                    | 1762           | 1682           | 80              | 134             | 214                      | 11.73                | 92.62           | 95.46                         | 88.71        | 94.02        |
| 109           | 2.00                 | 2535                    | 2530           | 2530           | 0               | 5               | 5                        | 0.20                 | 99.80           | 100.00                        | 99.80        | 99.90        |
| 111           | 2.26                 | 2133                    | 2123           | 2123           | 0               | 9               | 9                        | 0.42                 | 99.58           | 100.00                        | 99.58        | 99.79        |
| 112           | 2.26                 | 2550                    | 2539           | 2539           | 0               | 10              | 10                       | 0.39                 | 99.61           | 100.00                        | 99.61        | 99.80        |
| 113           | 1.82                 | 1796                    | 1794           | 1794           | 0               | 2               | 2                        | 0.11                 | 99.89           | 100.00                        | 99.89        | 99.94        |
| 114           | 3.56                 | 1890                    | 1855           | 1849           | 6               | 41              | 47                       | 2.49                 | 97.83           | 99.68                         | 97.52        | 98.74        |
| 115           | 1.82                 | 1962                    | 1952           | 1952           | 0               | 8               | 8                        | 0.41                 | 99.59           | 100.00                        | 99.59        | 99.80        |
| 116           | 2.60                 | 2421                    | 2391           | 2389           | 2               | 32              | 34                       | 1.40                 | 98.68           | 99.92                         | 98.60        | 99.29        |
| 117           | 2.00                 | 1539                    | 1534           | 1534           | 0               | 5               | 5                        | 0.32                 | 99.68           | 100.00                        | 99.68        | 99.84        |
| 118           | 2.60                 | 2301                    | 2277           | 2277           | 0               | 21              | 21                       | 0.91                 | 99.09           | 100.00                        | 99.09        | 99.54        |
| 119           | 2.08                 | 2094                    | 1987           | 1987           | 0               | 107             | 107                      | 5.11                 | 94.89           | 100.00                        | 94.89        | 97.38        |
| 121           | 1.91                 | 1876                    | 1862           | 1862           | 0               | 11              | 11                       | 0.59                 | 99.41           | 100.00                        | 99.41        | 99.71        |
| 122           | 2.00                 | 2479                    | 2475           | 2475           | 0               | 3               | 3                        | 0.12                 | 99.88           | 100.00                        | 99.88        | 99.94        |
| 123           | 2.17                 | 1519                    | 1514           | 1514           | 0               | 5               | 5                        | 0.33                 | 99.67           | 100.00                        | 99.67        | 99.84        |
| 124           | 1.91                 | 1634                    | 1619           | 1619           | 0               | 15              | 15                       | 0.92                 | 99.08           | 100.00                        | 99.08        | 99.54        |
| 200           | 2.17                 | 2792                    | 2597           | 2596           | 1               | 192             | 193                      | 6.91                 | 93.11           | 99.96                         | 93.08        | 96.42        |
| 201           | 3.12                 | 2039                    | 1908           | 1908           | 0               | 131             | 131                      | 6.42                 | 93.58           | 100.00                        | 93.58        | 96.68        |
| 202           | 2.17                 | 2146                    | 2131           | 2131           | 0               | 14              | 14                       | 0.65                 | 99.35           | 100.00                        | 99.35        | 99.67        |
| 203           | 3.65                 | 3108                    | 2708           | 2703           | 5               | 376             | 381                      | 12.26                | 87.79           | 99.82                         | 87.65        | 93.42        |
| 205           | 2.00                 | 2672                    | 2636           | 2636           | 0               | 32              | 32                       | 1.20                 | 98.80           | 100.00                        | 98.80        | 99.40        |
| 207           | 3.47                 | 2385                    | 2101           | 2093           | 8               | 278             | 286                      | 11.99                | 88.27           | 99.62                         | 87.98        | 93.60        |
| 208           | 3.73                 | 3040                    | 2908           | 2904           | 4               | 130             | 134                      | 4.41                 | 95.72           | 99.86                         | 95.59        | 97.74        |
| 209           | 2.00                 | 3052                    | 2986           | 2986           | 0               | 56              | 56                       | 1.83                 | 98.16           | 100.00                        | 98.16        | 99.07        |
| 210           | 2.08                 | 2685                    | 2580           | 2579           | 1               | 103             | 104                      | 3.87                 | 96.16           | 99.96                         | 96.12        | 98.02        |
| 212           | 2.08                 | 2763                    | 2747           | 2747           | 0               | 14              | 14                       | 0.51                 | 99.49           | 100.00                        | 99.49        | 99.75        |
| 213           | 2.43                 | 3294                    | 3246           | 3246           | 0               | 48              | 48                       | 1.46                 | 98.54           | 100.00                        | 98.54        | 99.27        |
| 214           | 1.91                 | 2297                    | 2257           | 2257           | 0               | 39              | 39                       | 1.70                 | 98.30           | 100.00                        | 98.30        | 99.14        |
| 215           | 2.26                 | 3400                    | 3342           | 3342           | 0               | 49              | 49                       | 1.44                 | 98.55           | 100.00                        | 98.55        | 99.27        |
| 219           | 2.43                 | 2312                    | 2147           | 2147           | 0               | 115             | 115                      | 4.97                 | 94.92           | 100.00                        | 94.92        | 97.39        |
| 220           | 2.00                 | 2069                    | 2045           | 2045           | 0               | 24              | 24                       | 1.16                 | 98.84           | 100.00                        | 98.84        | 99.42        |
| 221           | 2.34                 | 2462                    | 2409           | 2409           | 0               | 49              | 49                       | 1.99                 | 98.01           | 100.00                        | 98.01        | 98.99        |
| 222           | 4.60                 | 2634                    | 2422           | 2414           | 8               | 205             | 213                      | 8.09                 | 92.17           | 99.67                         | 91.89        | 95.77        |
| 223           | 2.17                 | 2643                    | 2602           | 2602           | 0               | 41              | 41                       | 1.55                 | 98.45           | 100.00                        | 98.45        | 99.22        |
| 228           | 2.78                 | 2141                    | 2046           | 2045           | 1               | 89              | 90                       | 4.20                 | 95.83           | 99.95                         | 95.78        | 97.85        |
| 230           | 2.43                 | 2466                    | 2255           | 2255           | 0               | 210             | 210                      | 8.52                 | 91.48           | 100.00                        | 91.48        | 95.55        |
| 231           | 2.26                 | 2011                    | 1571           | 1571           | 0               | 440             | 440                      | 21.88                | 78.12           | 100.00                        | 78.12        | 87.72        |
| 232           | 18.23                | 1816                    | 1781           | 1777           | 4               | 33              | 37                       | 2.04                 | 98.18           | 99.78                         | 97.96        | 98.97        |
| 233           | 2.08                 | 3152                    | 3065           | 3065           | 0               | 87              | 87                       | 2.76                 | 97.24           | 100.00                        | 97.24        | 98.60        |
| 234           | 1.82                 | 2764                    | 2752           | 2752           | 0               | 11              | 11                       | 0.40                 | 99.60           | 100.00                        | 99.60        | 99.80        |
| <b>Totals</b> | <b>120.13</b>        | <b>103724</b>           | <b>100279</b>  | <b>100135</b>  | <b>144</b>      | <b>3380</b>     | <b>3524</b>              | <b>3.40</b>          | <b>96.80</b>    | <b>99.83</b>                  | <b>96.66</b> | <b>98.25</b> |

## Figure

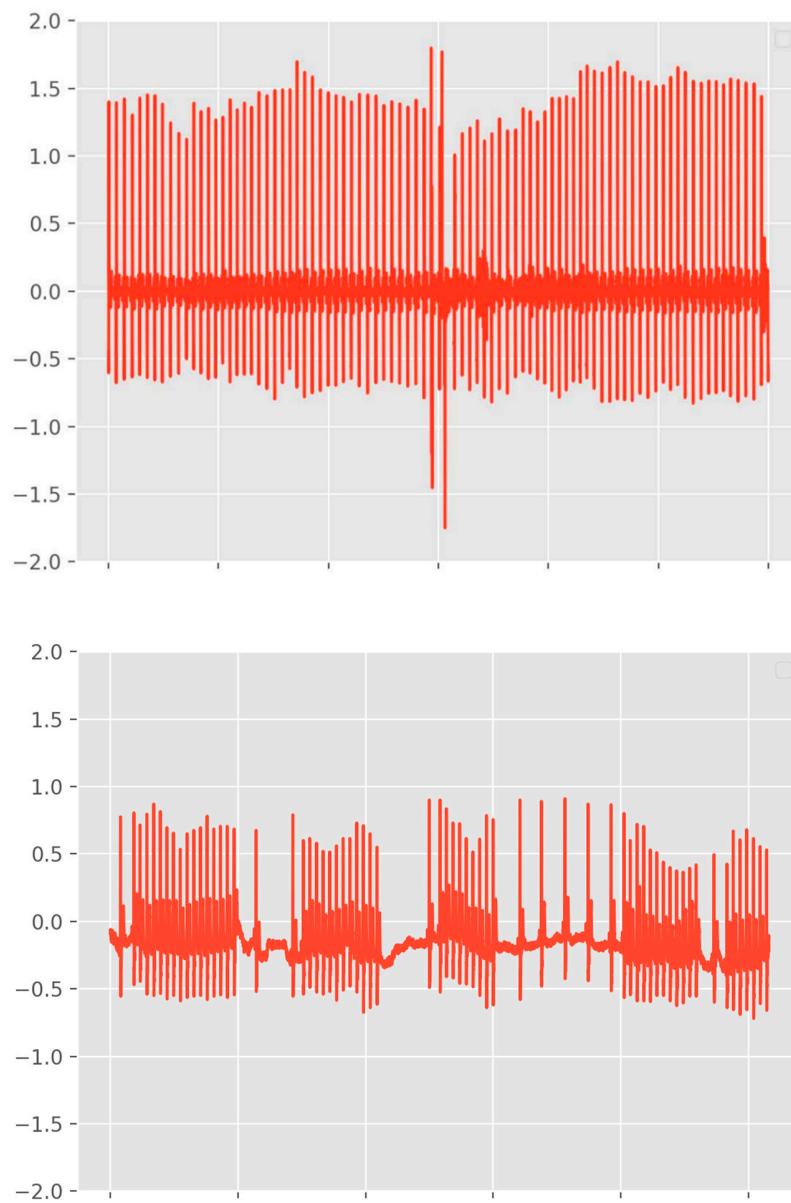

**Figure S1.** Representative raw ECG signals for samples 101 (top) and 232 (bottom) of the Arrhythmias dataset (B2) visually demonstrating differences in amplitude variability and the number of arrhythmias.

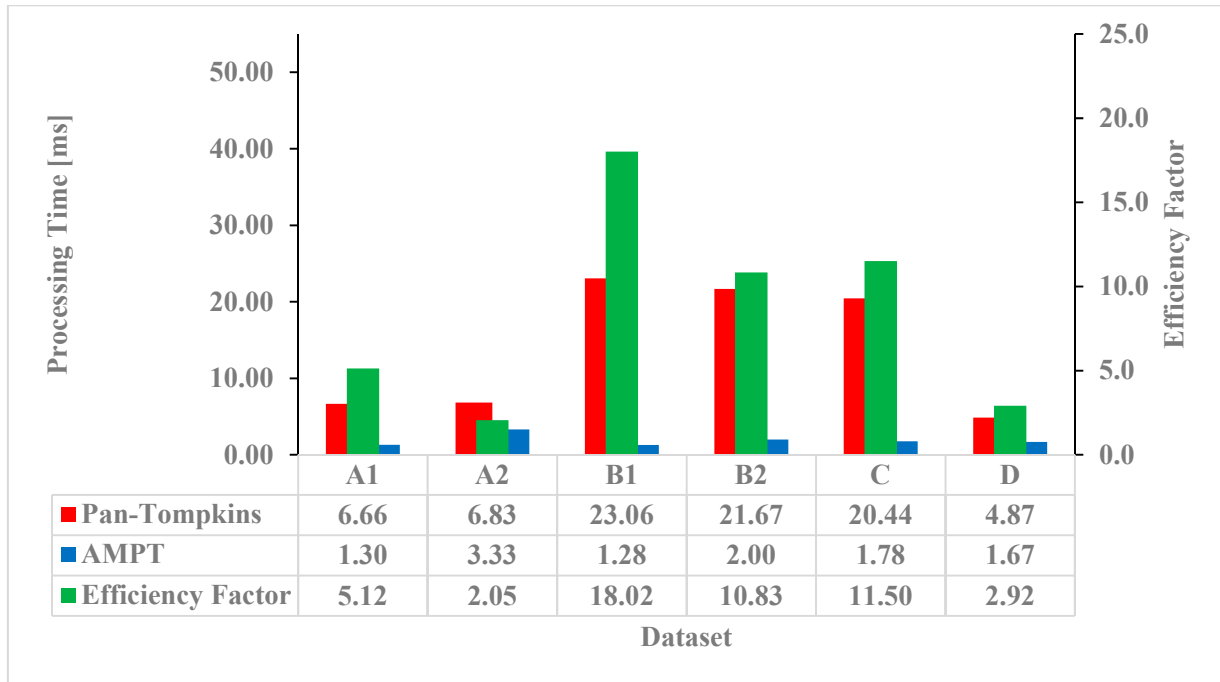

**Figure S2.** Processing time per ten seconds of ECG data for the Pan-Tompkins (red) and AMPT (blue) algorithms with their efficiency factors (green) by dataset. A1 = High-Quality, A2 = Low-Quality, B2 = Arrhythmias, C = Paced Rhythm, and D = Telehealth datasets after resampling to 200 Hz.

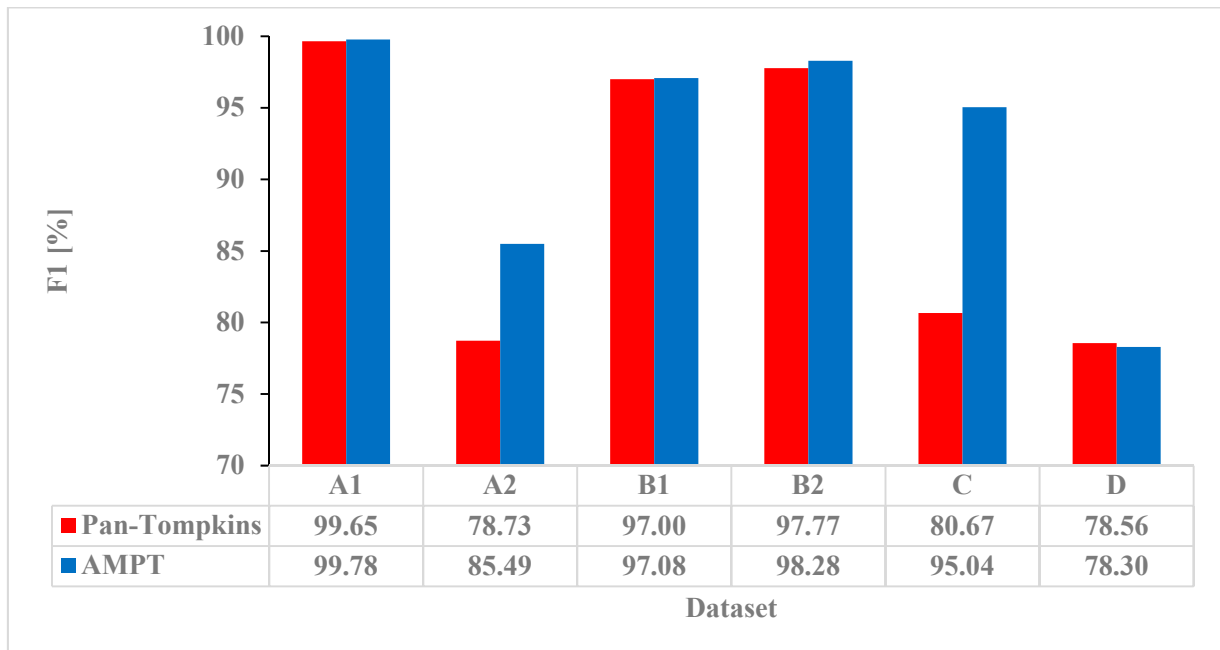

**Figure S3.** F1 correctness for the Pan-Tompkins (red) and AMPT (blue) algorithms by dataset. A1 = High-Quality, A2 = Low-Quality, B2 = Arrhythmias, C = Paced Rhythm, and D = Telehealth datasets after resampling to 200 Hz.
